# Supplementary material
Source: PubMed Central journal article supplement (PMC3998785)

Supplementary figures for

Comparative linkage maps suggest that fission, not polyploidy, underlies chromosome number doubling within the monkeyflowers (*Mimulus*; Phrymaceae)

Fig. S3. Concatenated *M. lewisii* group map (LPC). Scale is cM.

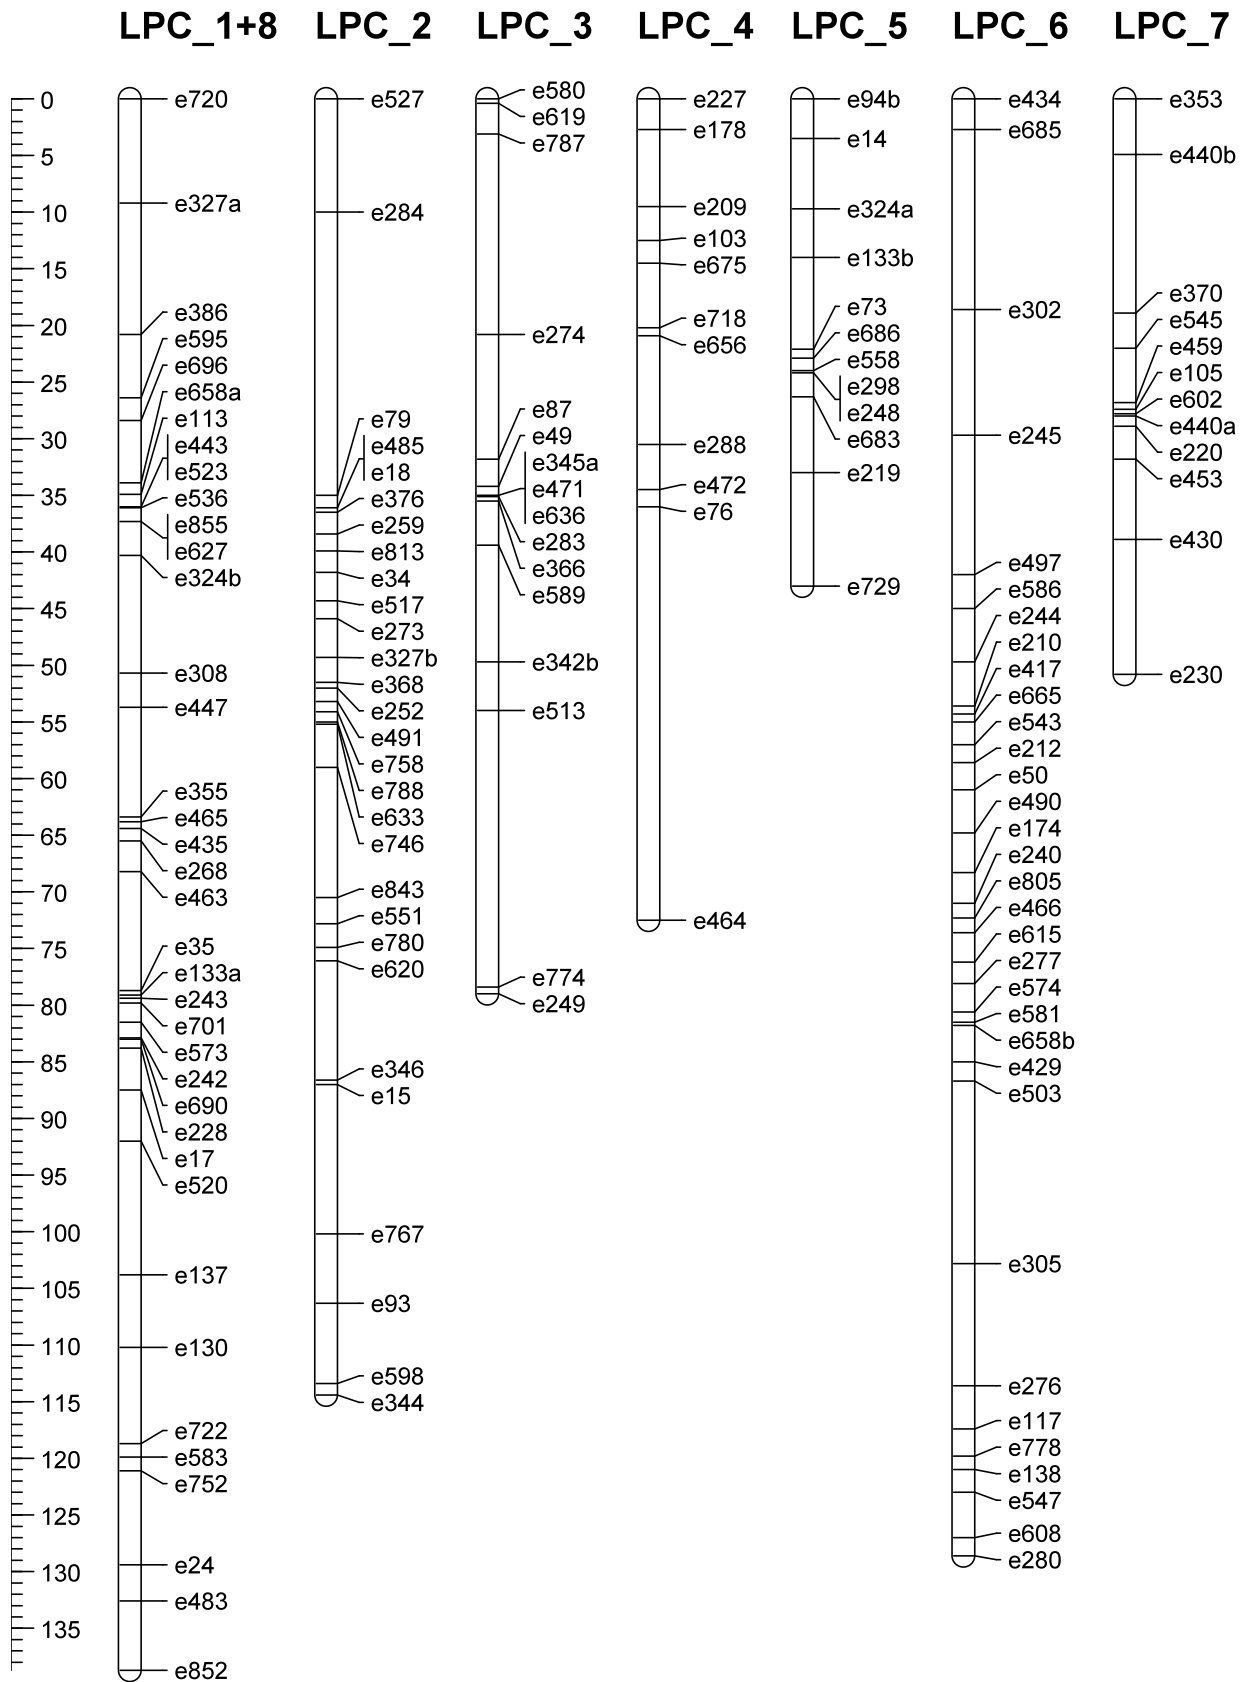

Supplement: hdy2013143x3.pdf [file hdy2013143x3.pdf]
